# Supplementary material for: Driving Pressure-Guided Dynamic PEEP Titration Reduces Atelectasis and Improves Oxygenation in Pediatric Laparoscopy: A Randomized Trial on Personalized Ventilation Strategies
Source: Research Square preprint supplement (doi:10.21203/rs.3.rs-6139700/v1), 2025-03-11
Supplement: Supplementary file 1 [file 6cfff7cfaed6882393fdcdf5.docx]

**
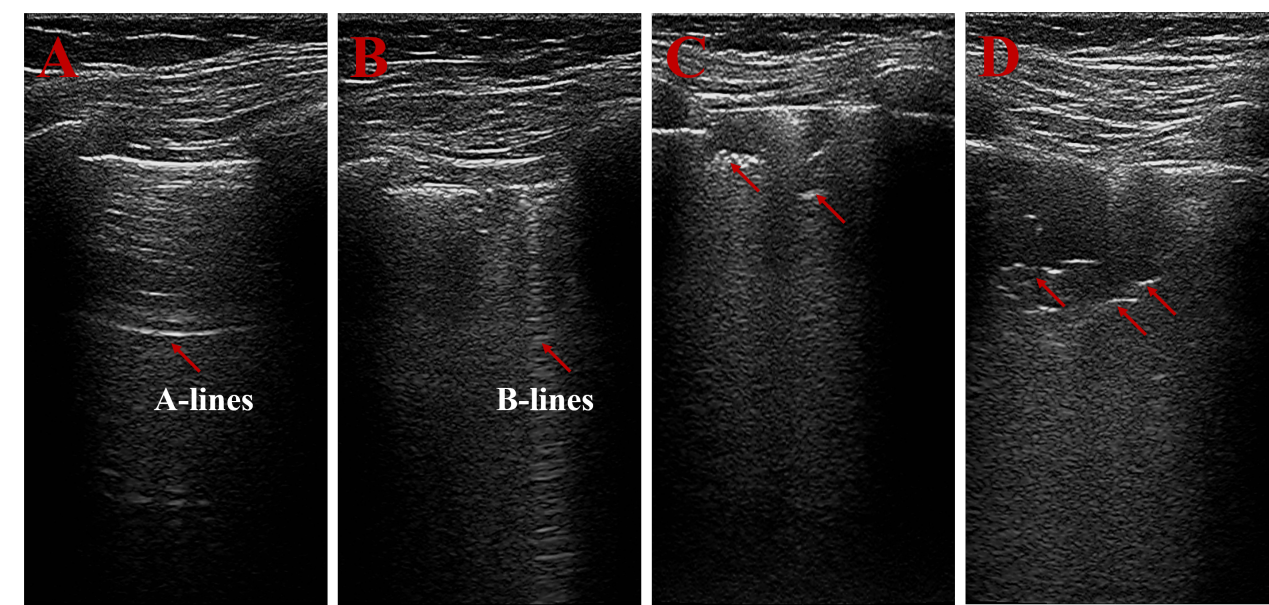
**

Figure 4: Reference Diagram for Modified Lung Ultrasound Scoring

A: 0 point - 0-2 B-lines; B: 1 point - ≥3 B-lines; C: 2 points - red arrow indicates small subpleural consolidation area; D: 3 points - red arrow indicates large subpleural consolidation area.
